# Supplementary material for: Differences in adiposity trajectories by birth cohort and childhood social class: evidence from cohorts born in the 1930s, 1950s and 1970s in the west of Scotland
Source: PubMed Central journal article supplement (PMC4033148; doi:10.1136/jech-2013-203551), 2014-02-06
Supplement: jech-2013-203551-s1.pdf [file jech-2013-203551-s1.pdf]

Supplementary table. Number of people participating in each wave and percentage of those participating with missing data for each variable by cohort and gender.

|                                  | Baseline<br>1987/8 | Wave2<br>1990/2 | Wave3<br>1995/7 | Wave4<br>2000/4 | Wave5<br>2007/8 |
|----------------------------------|--------------------|-----------------|-----------------|-----------------|-----------------|
| <i>Men</i>                       |                    |                 |                 |                 |                 |
| <b>1970s Cohort</b>              |                    |                 |                 |                 |                 |
| Number in cohort at each wave    | 737                | 637             | 419             | 384             | 424             |
| % Missing body mass index        | 5.0                | 2.0             | 4.1             | 3.1             | 1.4             |
| % Missing waist to height ratio  | 4.6                | 1.9             | 3.6             | 1.3             | 2.8             |
| % Missing childhood social class | 1.2                |                 |                 |                 |                 |
| <b>1950s Cohort</b>              |                    |                 |                 |                 |                 |
| Number in cohort at each wave    | 656                | 549             | 456             | 446             | 457             |
| % Missing body mass index        | 7.3                | 0.9             | 7.9             | 3.8             | 1.1             |
| % Missing waist to height ratio  | 7.0                | 1.3             | 6.8             | 0.9             | 1.8             |
| % Missing childhood social class | 4.0                |                 |                 |                 |                 |
| <b>1930s Cohort</b>              |                    |                 |                 |                 |                 |
| Number in cohort at each wave    | 702                | 580             | 450             | 368             | 279             |
| % Missing body mass index        | 6.7                | 0.7             | 8.7             | 6.3             | 6.8             |
| % Missing waist to height ratio  | 6.4                | 1.0             | 7.8             | 4.6             | 6.8             |
| % Missing childhood social class | 6.8                |                 |                 |                 |                 |
| <i>Women</i>                     |                    |                 |                 |                 |                 |
| <b>1970s Cohort</b>              |                    |                 |                 |                 |                 |
| Number in cohort at each wave    | 778                | 705             | 496             | 459             | 518             |
| % Missing body mass index        | 6.2                | 0.9             | 1.2             | 4.6             | 4.5             |
| % Missing waist to height ratio  | 5.9                | 2.4             | 3.2             | 10.7            | 8.1             |
| % Missing childhood social class | 2.2                |                 |                 |                 |                 |
| <b>1950s Cohort</b>              |                    |                 |                 |                 |                 |
| Number in cohort at each wave    | 788                | 676             | 570             | 534             | 542             |
| % Missing body mass index        | 5.7                | 0.74            | 1.2             | 3.4             | 2.6             |
| % Missing waist to height ratio  | 7.0                | 1.8             | 1.2             | 3.2             | 3.1             |
| % Missing childhood social class | 4.6                |                 |                 |                 |                 |
| <b>1930s Cohort</b>              |                    |                 |                 |                 |                 |
| Number in cohort at each wave    | 849                | 686             | 580             | 470             | 384             |
| % Missing body mass index        | 6.1                | 1.0             | 4.1             | 3.6             | 2.6             |
| % Missing waist to height ratio  | 5.8                | 1.3             | 2.1             | 1.9             | 3.4             |
| % Missing childhood social class | 5.7                |                 |                 |                 |                 |

Abbreviations: BMI, body mass index; WHtR, waist to height ratio
